# Supplementary material
Source: PubMed Central journal article supplement (PMC3574914)
Supplement: 1213839110_pnas.201213839SI.pdf [file 1213839110_pnas.201213839SI.pdf]

# Supporting Information

Mukherjee et al. 10.1073/pnas.1213839110

## SI Materials and Methods

**Cell Culture and Infection and Preparation of Parasite Lysate.** Peritoneal exudate cells, conveniently named macrophages (Mφs), were harvested from BALB/c, C57BL/6, Toll-like receptor 2<sup>-/-</sup> (TLR2<sup>-/-</sup>), TLR4<sup>-/-</sup>, and IL-10<sup>-/-</sup> mice by lavage 48 h after i.p. injection of 2% (wt/vol) soluble starch (SIGMA) (1). Mφs were plated on 90-mm tissue culture Petri dishes or in 24-well plates (Nunc) at a density of  $1 \times 10^7$  or  $1.5 \times 10^6$ , respectively, and also on sterile 22-mm square coverslips in 35-mm disposable Petri plates at a density of  $1.5 \times 10^5$  per coverslip in RPMI medium 1640 (SIGMA) supplemented with 10% (vol/vol) heat-inactivated FBS, 100 IU/mL penicillin, and 100 μg/mL streptomycin (GIBCO) (i.e., RPMI complete medium). The cells were left to adhere for 48 h at 37 °C under 5% (vol/vol) CO<sub>2</sub> before infection. Mφs were infected with stationary-phase *Leishmania donovani* (LD) promastigotes at a ratio of 1:10 for 6 h, washed to remove free parasites, and incubated for another 24 h or 48 h to determine the infection rate. Supernatants obtained from Mφs infected with stationary-phase LD promastigotes at a ratio of 1:10 for 48 h were subsequently used for ELISA experiments unless otherwise stated. Parasite lysates were prepared as described by Kapler et al. (2) with slight modifications. The protein content of the lysate was estimated, and an equal concentration of the lysate protein was directly used for the experiment without further centrifugation steps.

**Treatment.** Stationary-phase LD promastigotes were centrifuged at  $1,800 \times g$  for 10 min. The supernatant was discarded, and the pellet was resuspended in a minimum volume of PBS and treated with galactosidase (0.2 units; SIGMA) for 1 h at 37 °C to remove surface sugar. The parasites were washed and fixed with 1% paraformaldehyde for 15 min and washed five times with cold PBS (3). These paraformaldehyde-treated parasites were then resuspended in complete medium before infecting the Mφs. In some experiments, Mφs were treated with 10 μM ERK1/2 inhibitor U0126 (4), 20 μM PD 98059 (5), 1 μM PI3K inhibitor (wortmannin) (6), 20 μM IκB kinase inhibitor BAY 11-7082 (7), 25 μM JNK inhibitor SP 600125 (8), or 10 μM p38 inhibitor SB 203580 (9) for 45 min before infection in serum-free medium. In some experiments, Mφs were treated with murine IL-10 (2, 20, or 200 pg/mL) for 12 or 48 h in the presence or absence of 10 μg/mL αIL-10 Ab/isotype control Ab, which was preincubated for 1 h before infecting the Mφs. In some experiments, Mφs were stimulated with LPS (1 μg/mL) and used as a positive control.

## Generation of Galactosyltransferase Knockdown Antimony-Resistant LD: Construction of Expression Vectors and Transfection in *Leishmania*.

The antisense construct of the galactosyltransferase (GalT) gene was generated by PCR amplification of the 1,414- to 1,653-nt region of the phosphoglycan β-1,3 galactosyltransferase 3 gene (*LdGalT3*) from the genomic DNA of LD parasites using the sense primer 5'-CGGGATCCCTGTGGCAGGAGGCGCTG-CACCACCGCAA-3' and the antisense primer 5'-TCCCCGGGGTCGCTCAAGTACTGTGGCACCTTCAGGTA-3' and was then cloned in an antisense orientation in the SmaI/BamHI sites of the pXG-B2863 vector (a kind gift from S. M. Beverley, University of Washington, Seattle, WA); this was termed anti-*LdGalT*. The construct, along with the empty vector pXG-B2863, was transfected into LD promastigotes by electroporation as described previously (2). Briefly, late-log-phase promastigotes were harvested and washed twice in OPTI-MEM (GIBCO). Cells were then suspended at a density of  $1 \times 10^8$

cells/mL, and 0.4 mL of this was taken into a 0.2-mm ice-chilled electroporation cuvette. Thirty micrograms of plasmid DNA was taken in 100 μL of electroporation buffer and added to the cells. After 10 min on ice, the cells were electroporated with a single pulse by a Bio-Rad Gene Pulsar apparatus using 450-V and 550-μF capacitance. The cells were incubated on ice for a further 5 min and then added to 10 mL of drug-free growth medium. After 24 h of survival, 10 μg/mL G418 was added and kept at 22 °C. The transfected cells were monitored visually by microscope, and the drug concentration was increased gradually. Finally, the transfected cells were routinely maintained in medium containing 200 μg/mL G418.

**Dye Uptake and Retention Assay.** Antimony-sensitive LD (Sb<sup>S</sup>LD)- and antimony-resistant LD (Sb<sup>R</sup>LD)-infected Mφs were washed and resuspended ( $2 \times 10^5$  cells/mL) in serum-free RPMI, incubated with an optimum concentration (250 ng/mL) of free Rh123 for 32 h, washed, and further incubated in media free of Rh123. In some experiments, Mφs were incubated with Rh123 for 16 h, after which they were washed and further incubated in Rh123-free medium with an increasing concentration of either recombinant IL-10 (rIL-10) or rIL-2 (2, 20, or 200 pg/mL) for another 2 h. At indicated time points, cells were washed three times in PBS and finally lysed in 0.1% Triton X-100. The intracellular dye concentrations were determined by measuring the fluorescence intensity of the cell lysates.

**Flow Cytometry and Confocal Microscopy.** Stationary-phase LD parasites ( $2 \times 10^6$  cells/mL each), were stained with FITC-labeled *Dolichos biflorus* agglutinin and compared with their mannose level specific to Con A lectin. Samples were subjected to flow cytometry analysis in a FACS Aria II cell sorter (Becton Dickinson). The mean fluorescence intensity was analyzed by FACS DIVA software (Becton Dickinson), and, accordingly, the relative expression of surface sugar was determined. Multidrug-resistant protein 1 (MDR1) was stained using a primary anti-MDR1 Ab (Santa Cruz Biotechnology), followed by a secondary FITC-conjugated anti-rabbit whole-IgG molecule (SIGMA). The appropriate isotype control was used for each experiment. Staining was performed 48 h after washing the unpermeabilized infected cells in cold PBS, specifically to check the expression of MDR1 on the host cell surface (10).

**EMSA.** DNA probes specific for murine IL-10 promoter containing WT or mutant NF-κB binding sites, represented by the WT mIL-10 probe 5'-GCCCTCTCGGGGTTTCCTTTGGG-3' and the mutant (Mut) mIL-10 probe 5'-GCCCTCTCCTCTTTTAAAT-TTGGG-3' (NF-κB binding site is underlined, and mutated bases are italicized), respectively, were used. Supershift EMSA was carried out using the following Abs: αp50, αc-Rel (Santa Cruz Biotechnology), and αp65 (Cell Signaling Technology). For the MDR1 promoter, WT or mutant activator protein-1 (AP-1) binding sites, represented by the WT mMDR1 probe 5'-CAA-TAATACTTGAGTCAAGCTGG-3' and the Mut mMDR1 probe 5'-CAATAATACTACAGTGTAGCTGG-3' (AP-1 binding site is underlined, and mutated bases are italicized), respectively, were used. Supershift EMSA for the MDR1 promoter was carried out using the following Abs: α-Fos, α-Jun, and αFra1 (Cell Signaling Technology). Bands were visualized using a phosphorimager.

**Western Blot Analysis.** Blots were probed with specific Abs. Binding of secondary HRP-labeled goat anti-rabbit or goat anti-mouse

Abs (Cell Signaling Technology) was analyzed using SuperSignalR West Pico or West Dura Chemiluminescent substrate (Pierce).

**Reporter Assay.** The murine IL-10 promoters –17/–1,576 (1.57 kb; 5'-GCTGGGTCTTGAGCCTCTTCTGG-3' and 5'-CTGCAAGGCTGCCTTGTGGCTTTG-3'), –17/–292 (275 bp; 5'-GAGGTAGCCATACTAAAAATAGC-3' and 5'-CTGCAAGGCTGCCTTGTGGCTTTG-3'), and –864/–1,138 (274 bp; 5'-GGAAGGACAGCCCGGAGTGTACC-3' and 5'-CCTGGGAGATCTCTGGTAGTCC-3') and the murine MDR1 promoters +37/–154 (191 bp; 5'-CCTGTTTCGCAATTTCTC-3' and 5'-GATGGGACCAGCAGCTCC-3') and +37/–116 (153 bp; 5'-AGCTGGGCCGGGAGCTGG-3' and 5'-GATGGGACCAGCAGCTCC-3') were PCR-amplified and cloned into a pGL3-Basic vector (Promega). Using the IL-10 promoter construct (1.57 kb) and a QuickChangeII PCR-based site-directed mutagenesis kit (Stratagene), the Mut IL-10 promoter construct, containing a deletion at NF-κB binding site –583/–593 of IL-10 promoter, was generated. A Mut MDR1 promoter construct

containing a deletion at AP-1 binding site –117/–123 was also generated using the MDR1 promoter construct (191 bp). All the inserts were confirmed by sequencing. RAW264.7 cells were transiently transfected with these IL-10 or MDR1 promoter constructs (2 μg) using Lipofectamine 2000 (Invitrogen), rested for 12 h, and either treated with rIL-10 or infected with Sb<sup>R</sup>LD, Sb<sup>S</sup>LD, or GalT knockdown Sb<sup>R</sup>LD for 48 h. Luciferase activity in cell extracts was measured using the Dual Luciferase Reporter kit (Promega) according to the manufacturer's protocols, and the luciferase activity was normalized to the level of the protein content.

**ChIP Analysis.** Immunoprecipitation was performed using rabbit IgG or NF-κB Abs, such as αp50, αp65, and c-Rel, overnight at 4 °C, followed by DNA extraction. A PCR assay was performed to amplify the –482/–645 region of IL-10 promoter using primers 5'-GCCCCACAGCACACATATCC-3' and 5'-CCTGGGTTGAACGTC-3'.

1. Chakraborty D, et al. (2005) Leishmania donovani affects antigen presentation of macrophage by disrupting lipid rafts. *J Immunol* 175(5):3214–3224.
2. Kapler GM, Coburn CM, Beverley SM (1990) Stable transfection of the human parasite Leishmania major delineates a 30-kilobase region sufficient for extrachromosomal replication and expression. *Mol Cell Biol* 10(3):1084–1094.
3. Chandra D, Naik S (2008) Leishmania donovani infection down-regulates TLR2-stimulated IL-12p40 and activates IL-10 in cells of macrophage/monocytic lineage by modulating MAPK pathways through a contact-dependent mechanism. *Clin Exp Immunol* 154(2):224–234.
4. Yanagawa Y, Onoé K (2007) Enhanced IL-10 production by TLR4- and TLR2-primed dendritic cells upon TLR restimulation. *J Immunol* 178(10):6173–6180.
5. Feng GJ, et al. (1999) Extracellular signal-related kinase (ERK) and p38 mitogen-activated protein (MAP) kinases differentially regulate the lipopolysaccharide-mediated induction of inducible nitric oxide synthase and IL-12 in macrophages: Leishmania phosphoglycans subvert macrophage IL-12 production by targeting ERK MAP kinase. *J Immunol* 163(12):6403–6412.
6. Hirji N, Lin TJ, Bissonnette E, Belosevic M, Befus AD (1998) Mechanisms of macrophage stimulation through CD8: macrophage CD8alpha and CD8beta induce nitric oxide production and associated killing of the parasite Leishmania major. *J Immunol* 160(12):6004–6011.
7. Choi S, et al. (2006) Nuclear factor-kappaB activated by capacitative Ca<sup>2+</sup> entry enhances muscarinic receptor-mediated soluble amyloid precursor protein (sAPPalpha) release in SH-SY5Y cells. *J Biol Chem* 281(18):12722–12728.
8. Mingo-Sion AM, Marietta PM, Koller E, Wolf DM, Van Den Berg CL (2004) Inhibition of JNK reduces G2/M transit independent of p53, leading to endoreduplication, decreased proliferation, and apoptosis in breast cancer cells. *Oncogene* 23(2):596–604.
9. Lee JT, Jr., Steelman LS, McCubrey JA (2004) Phosphatidylinositol 3'-kinase activation leads to multidrug resistance protein-1 expression and subsequent chemoresistance in advanced prostate cancer cells. *Cancer Res* 64(22):8397–8404.
10. Mookerjee Basu J, et al. (2008) Inhibition of ABC transporters abolishes antimony resistance in Leishmania infection. *Antimicrob Agents Chemother* 52(3):1080–1093.
